# Supplementary material for: A new Schiff base and its metal complex as colorimetric and fluorescent–colorimetric sensors for rapid detection of arginine
Source: Royal Society of Chemistry journal article supplement (doi:10.1039/c5nj02787j), 2016-01-01
Supplement: c5nj02787j1.pdf [file c5nj02787j1.pdf]

## Supplementary documents

### **A new Schiff base and its metal complex as a fluorescent-colorimetric sensor for rapid detection of arginine**

**Anupam Ghorai, Jahangir Mondal and Goutam K Patra\***

**Department of Chemistry, Guru Ghasidas Vishwavidyalaya, Bilaspur (C.G)**

#### **Table of contents**

- 1.  $^1\text{H}$  NMR spectra of L**
- 2.  $^{13}\text{C}$  NMR Spectra of L**
- 3. Overlaid FTIR spectra of L and  $[\text{PbL}_2]^{2+}$**
- 4. Mass spectra of L**
- 5.  $^1\text{H}$  NMR spectra of  $[\text{PbL}_2]^{2+}$**
- 6. HRMS spectra of  $[\text{PbL}_2]^{2+}$**
- 7. SEM images of L and  $[\text{PbL}_2]^{2+}$**
- 8. Absorbance spectra of L on addition of cations and anions**
- 9. Emission spectra of L on addition of cations**
- 10. Absorbance spectra of L in different solvents**
- 11. Emission spectra of L in different solvents**
- 12. Detection limit of L and  $[\text{PbL}_2]^{2+}$**
- 13. Absorbance spectra of  $[\text{PbL}_2]^{2+}$  on addition of different amino acids**
- 14. HRMS Spectra of L-Arg adduct**

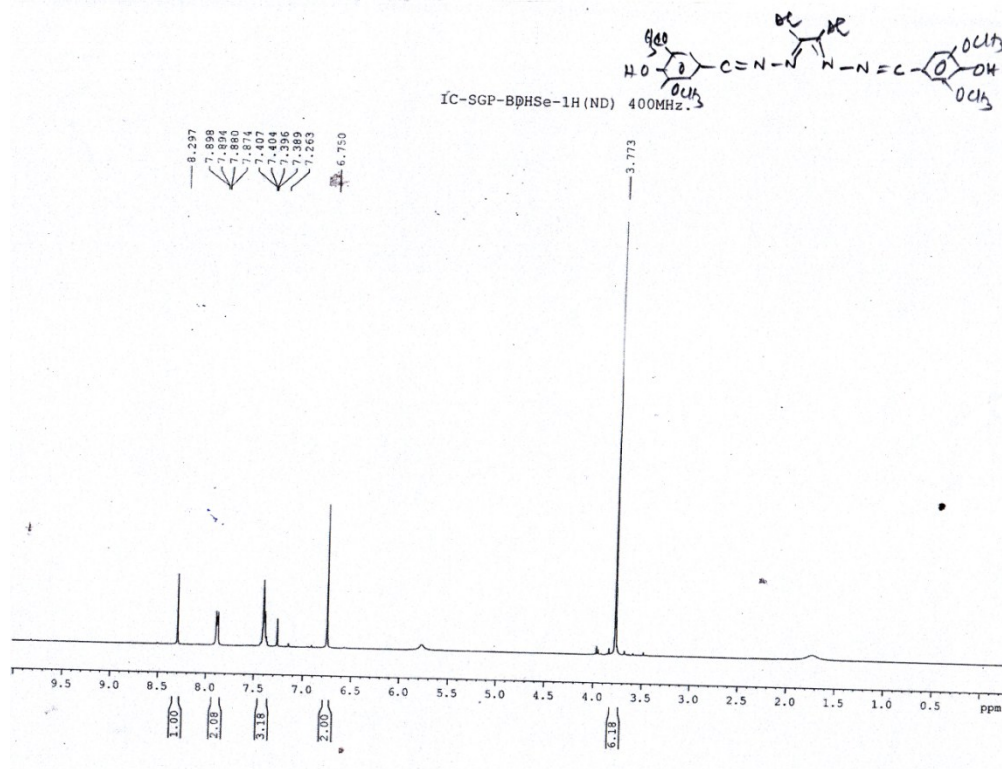

Fig. S1 <sup>1</sup>H NMR spectra of L in CDCl<sub>3</sub>.

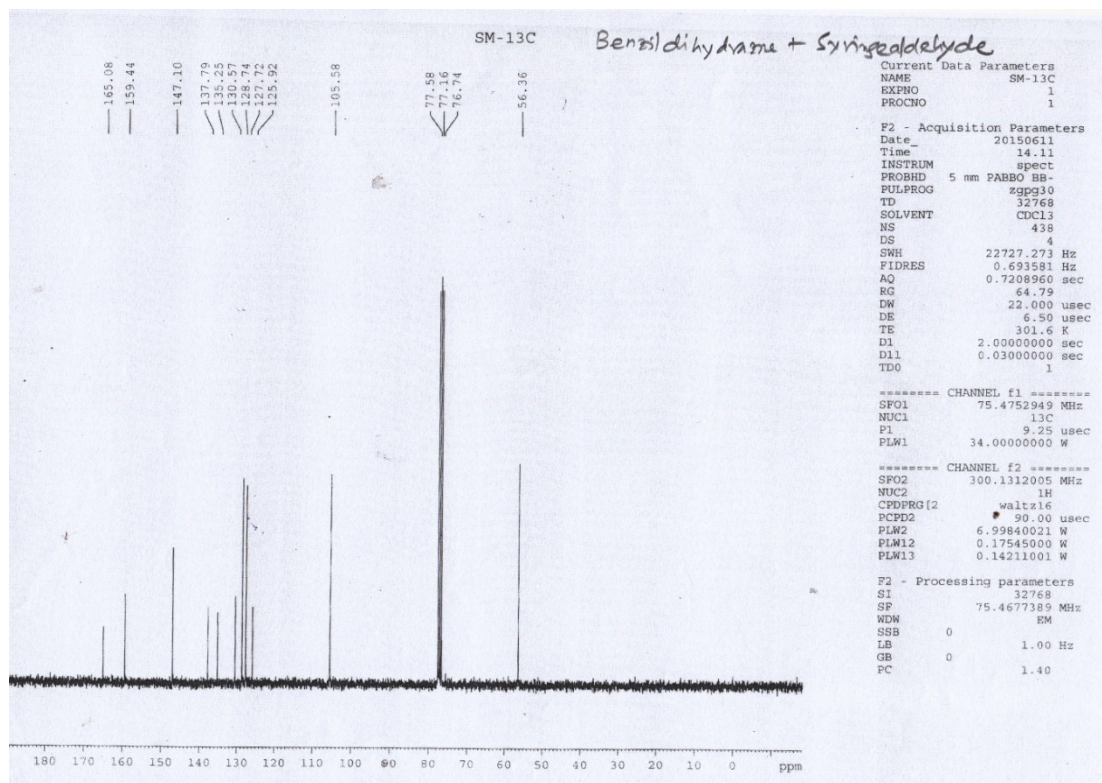

Fig. S2 <sup>13</sup>C NMR Spectra of L in CDCl<sub>3</sub>.

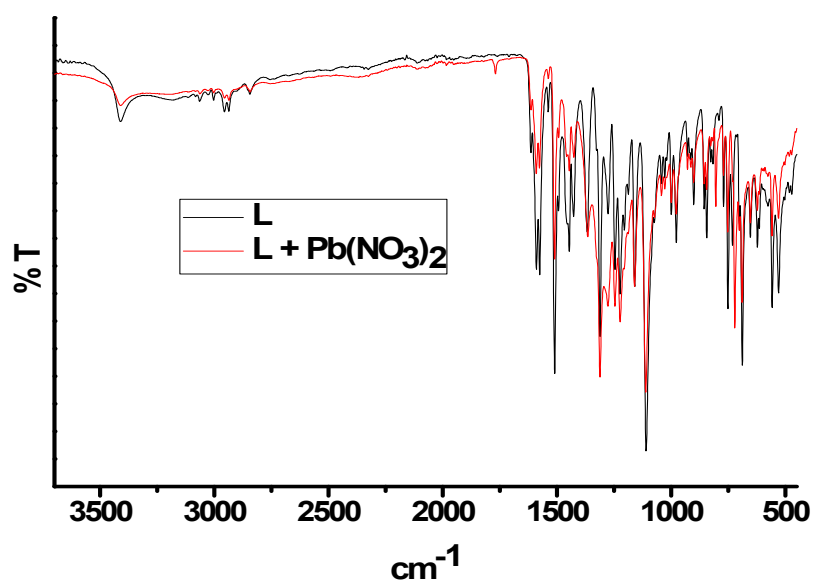

Fig. S3 Overlaid FTIR spectra of L and [PbL<sub>2</sub>]<sup>2+</sup>

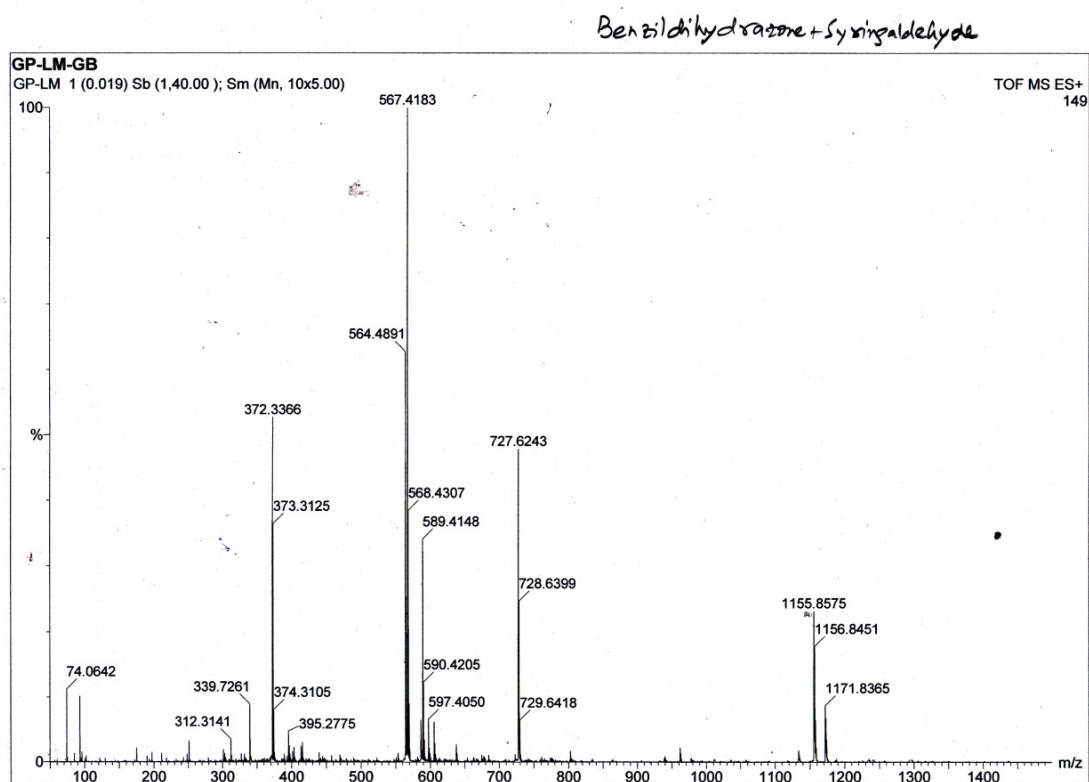

Fig. S4 Mass spectra of L.

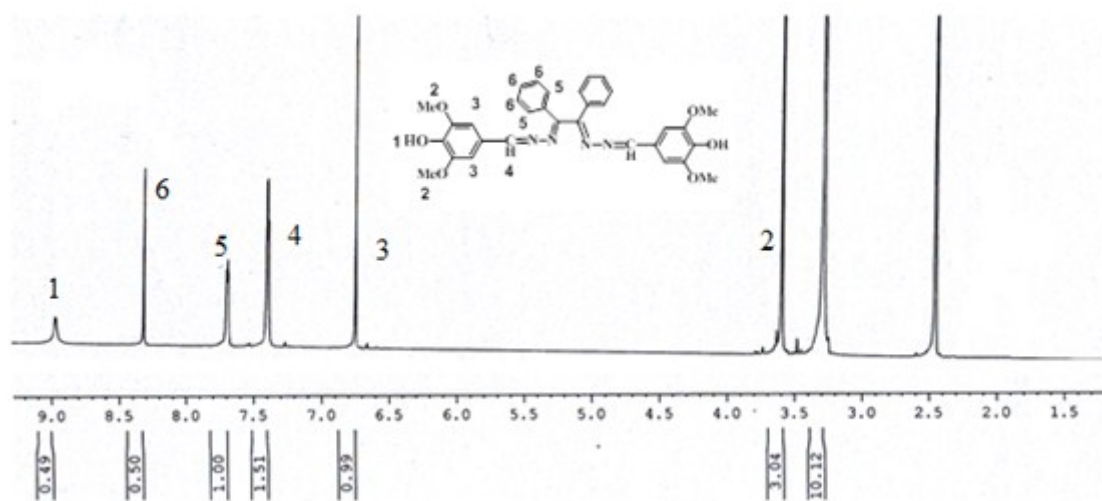

Fig. S5  $^1\text{H}$ NMR spectra of  $[\text{PbL}_2]^{2+}$  in  $\text{d}_6$ -DMSO.

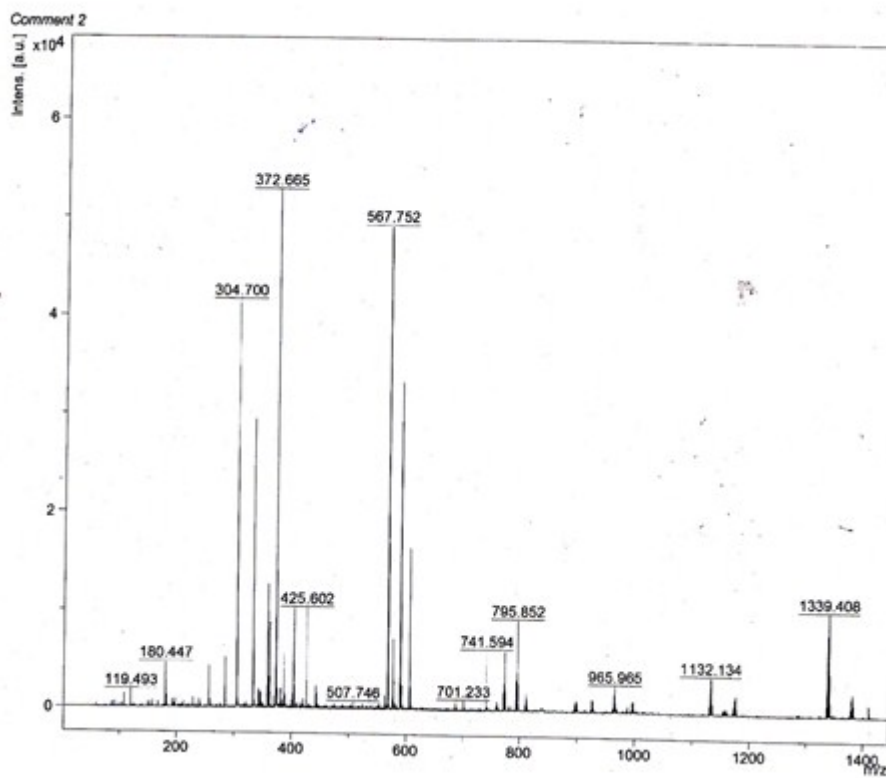

Fig. S6 Mass spectra of  $[\text{PbL}_2]^{2+}$ .

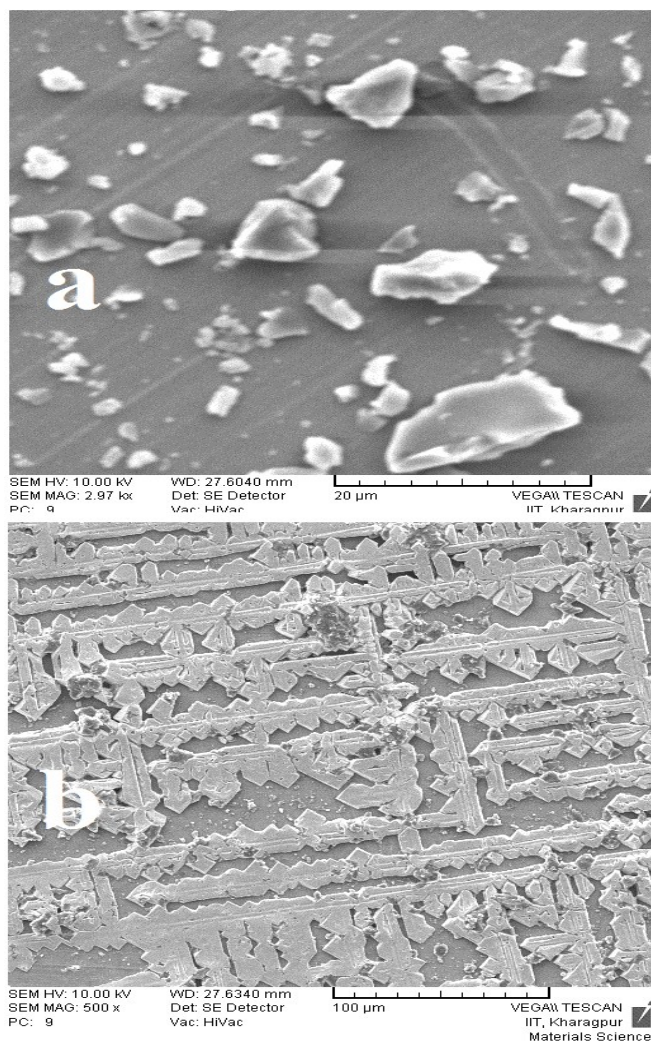

**Fig. 7** (a) SEM image of **L** (b) SEM image of the  $[\text{PbL}_2]^{2+}$  complex.

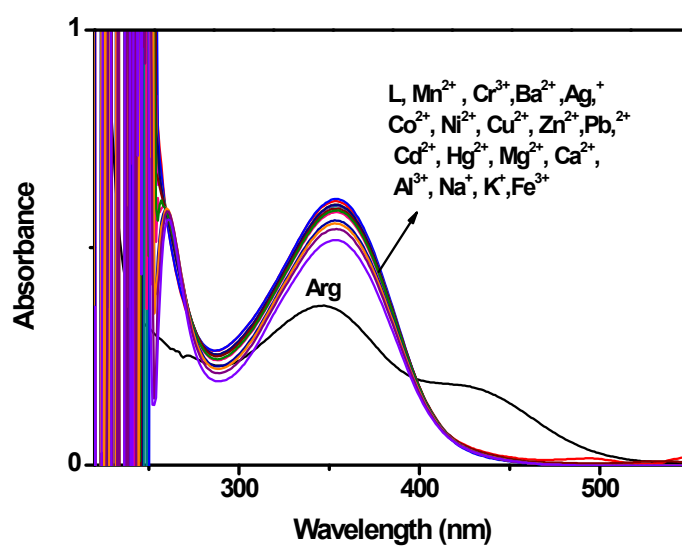

(a)

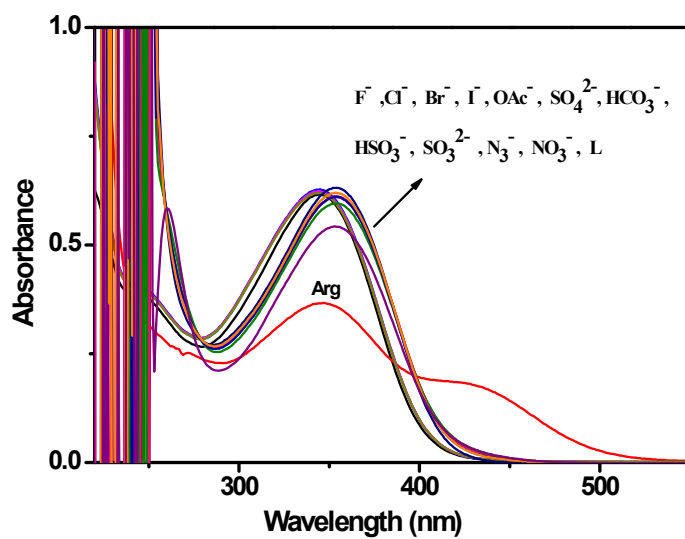

(b)

**Fig. S8** Change of absorbance spectra of L on addition of different (a) cations and (b) anions.

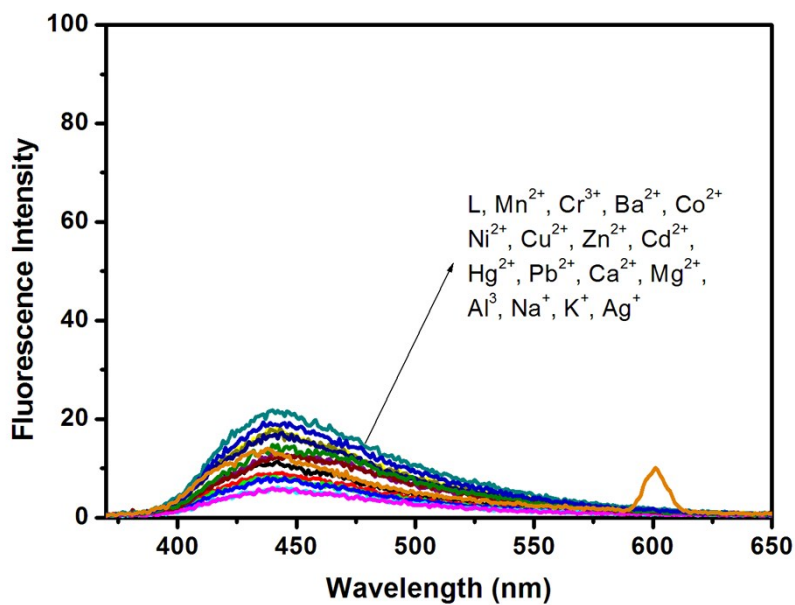

**Fig. S9** Change of emission spectra of L on addition of different (a) cations and (b) anions.

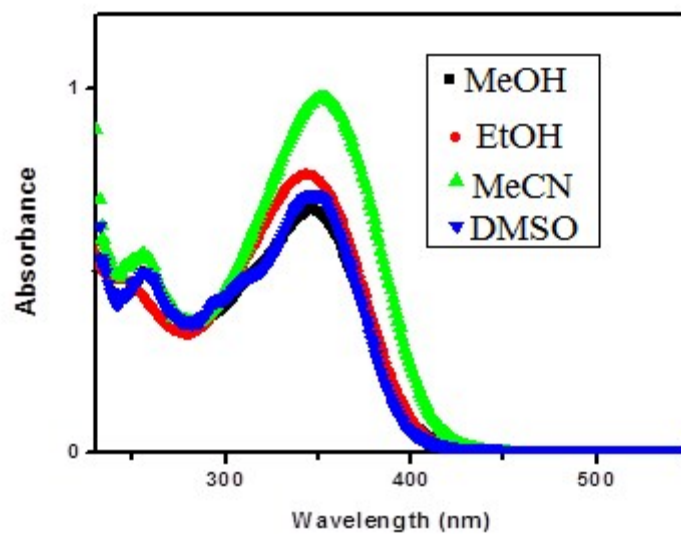

Fig. S10 Absorbance spectra of L in different solvents.

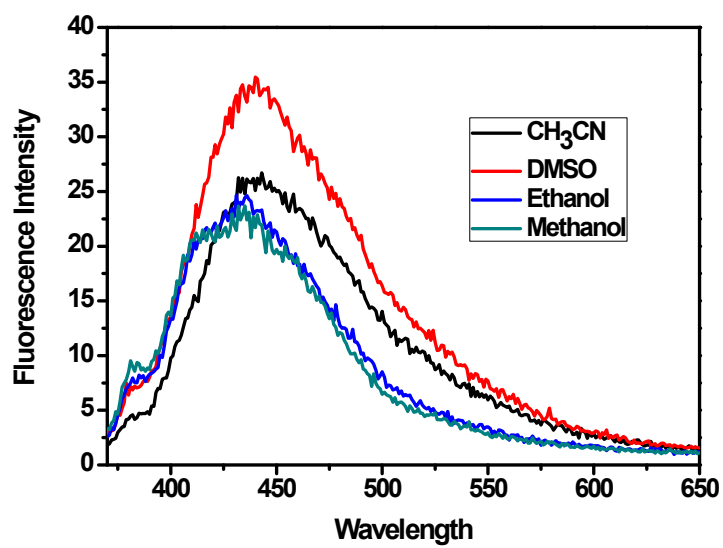

Fig. S11 Emission spectra of L in different solvents.

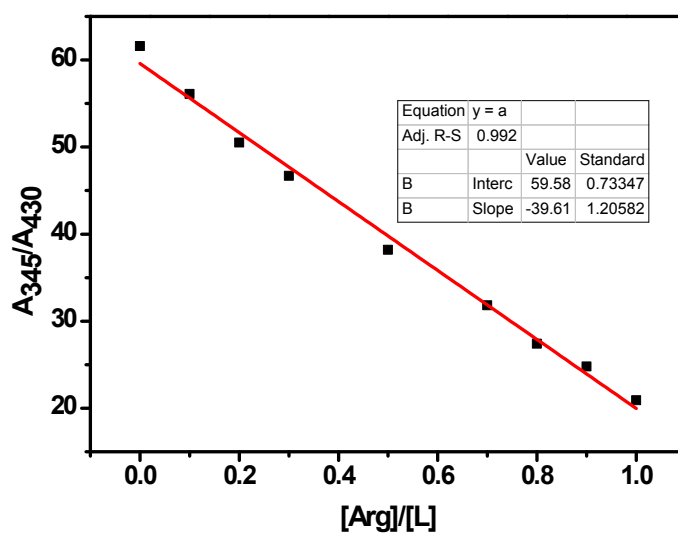

(a)

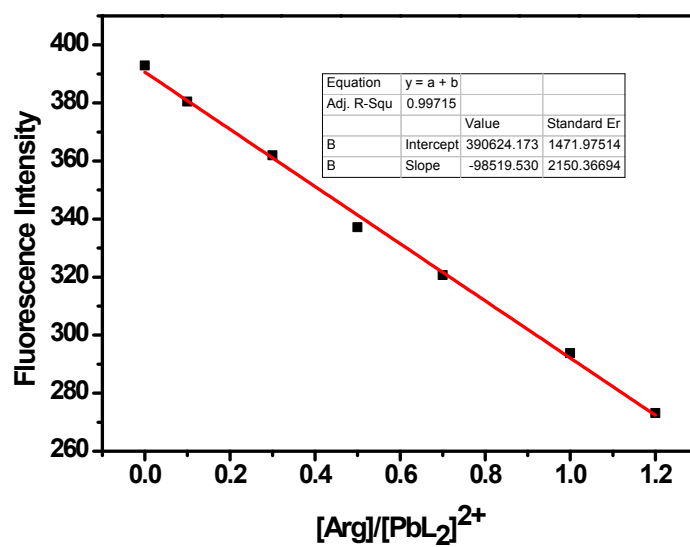

(b)

Fig. S12 Detection limit for (a) L and (b)  $[\text{PbL}_2]^{2+}$ .



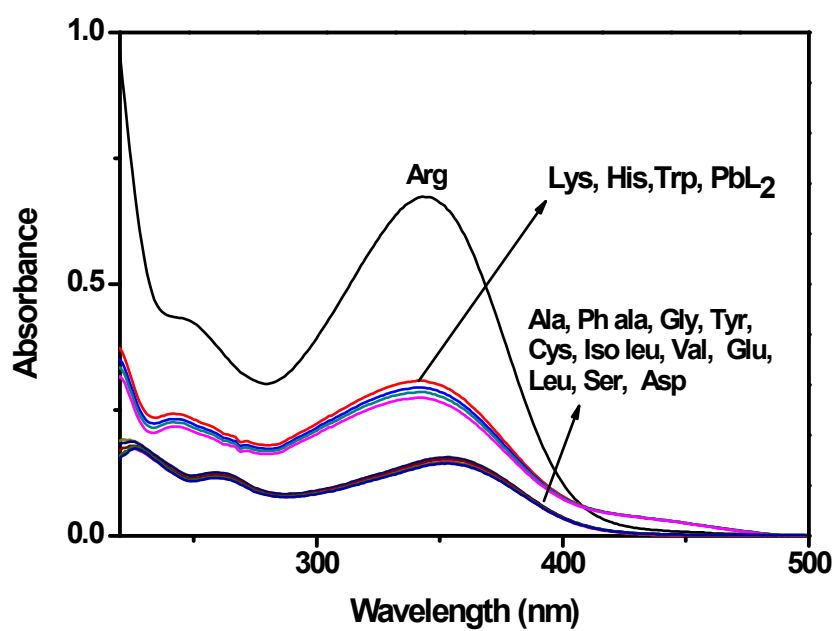

Fig. S13 Change in absorbance spectra of  $[PbL_2]^{2+}$  on addition of different amino acids.

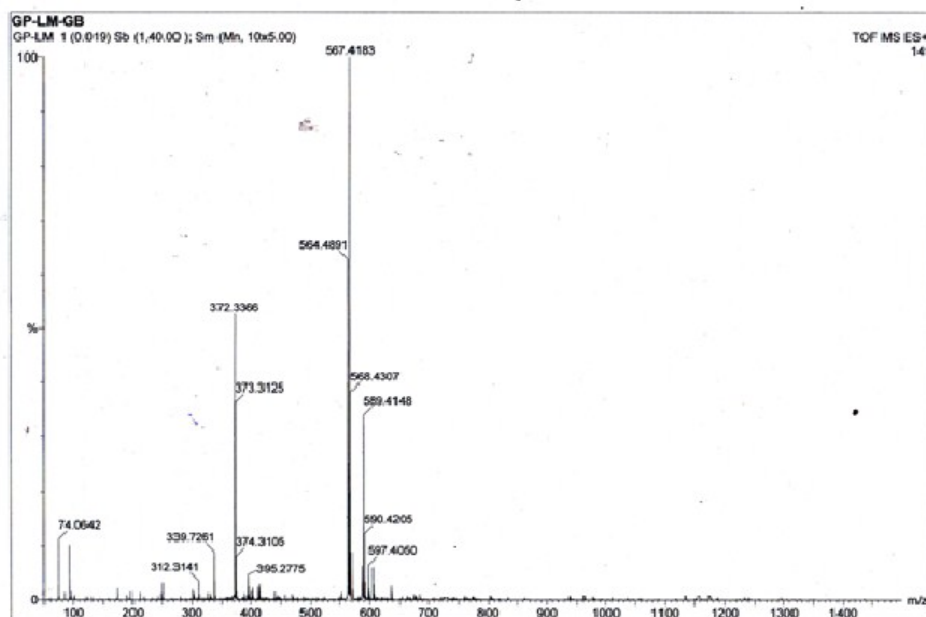

Fig. S14 HRMS Spectra of L-Arg adduct
